# Supplementary material for: Recycled Brewer’s Spent Grain (BSG) and Grape Juice: A New Tool for Non-Alcoholic (NAB) or Low-Alcoholic (LAB) Craft Beer Using Non-Conventional Yeasts
Source: MDPI journal article supplement (doi:10.3390/foods13040505), 2024-02-06
Supplement: s1 [file s1]

**Table S1. Retention time of the volatile compounds evaluated**

| <b>Volatile<br/>compounds<br/>mg/L</b>  | <b>(Retention Time<br/>min)</b> |
|-----------------------------------------|---------------------------------|
| Ethyl butyrate<br>(0.14–0.37) *         | 7.151                           |
| Isoamyl acetate<br>(0.30–0.72) *        | 9.082                           |
| Ethyl hexanoate<br>(0.17–0.20) *        | 15.219                          |
| Hexanol                                 | 21.807                          |
| Ethyl octanoate<br>(0.2–0.9) *          | 25.456                          |
| Linalool<br>(0.0006–0.001) *            | 30.970                          |
| Diethylsuccinate<br>(1.2) *             | 32.933                          |
| Phenyl ethyl acetate<br>(3–5) *         | 40.615                          |
| Nerol<br>(0.01) *                       | 41.648                          |
| Geraniol<br>(1.1) *                     | 41.987                          |
| $\beta$ -phenyl ethanol<br>(1.0–1.88) * | 44.175                          |
